# Supplementary material
Source: PubMed Central journal article supplement (PMC4771698)
Supplement: me-15-1274.pdf [file me-15-1274.pdf]

#### Supplemental Table 1:

Ingenuity Pathway Analysis (IPA) shows the top 20 enriched canonical pathways in ESR1-regulated gene sets. Genes with >1.2-fold difference in transcript abundance in *ESR1* siRNA-treated versus control siRNA-treated HESC were selected for analysis. The *left* y-axis corresponds to the blue bars representing the negative logarithm of Benjamini-Hochberg *P* value (B-H *P* value) of the enrichment analysis. The threshold was set at a B-H *P* value of 0.05. The *right* y-axis corresponds to the line graph (yellow squares) representing the ratio of the number of molecules in a given pathway divided by total number of molecules that contribute to that pathway. This figure was generated using IPA software.

#### Supplemental Table 2:

IPA analysis showing the list of top five associated network functions enriched in ESR1 regulated gene sets and related scores. Genes with >1.2-fold difference in transcript levels in *ESR1* siRNA treated samples compared to non-targeting siRNA treated controls in three independent microarrays were selected for analysis.

#### Supplemental Table 3:

IPA analysis showing the list of top five molecular and cellular functions enriched in ESR1 regulated gene sets, related p-values, and number of molecules in each functional category. Genes with >1.2-fold difference in transcript levels in *ESR1* siRNA treated samples compared to non-targeting siRNA treated controls in three independent microarrays were selected for analysis.

#### Supplemental Table 4:

Cell cycle associated genes enriched in ESR1 regulated gene sets in differentiating HESC. Mean fold changes represent the mean ratio of the normalized expression level of each gene in ESR1 depleted cells compared to non-targeting siRNA treated control cells from three independent microarray analysis.

#### Supplemental Table 5:

List of peptides and corresponding proteins identified by mass spectrometry as potential targets of PKA during HESC differentiation.

#### Supplemental Figure 1:

HESC were transfected with control (scrambled) siRNA or siRNA targeting ESR1. 48 h after transfection, cells were treated with differentiation cocktail for 1 h. MED1 ChIP was performed.

Chromatin enrichment was quantified by real-time RT-PCR using primers flanking the potential ESR1 binding site located 67kb upstream of WNT4 gene and a control region (chr13:109144684-109145891) which does not contain a consensus ERE. To calculate the enrichment of chromatin, the resulting signals were normalized to 1% input DNA.

Supplemental Figure 1

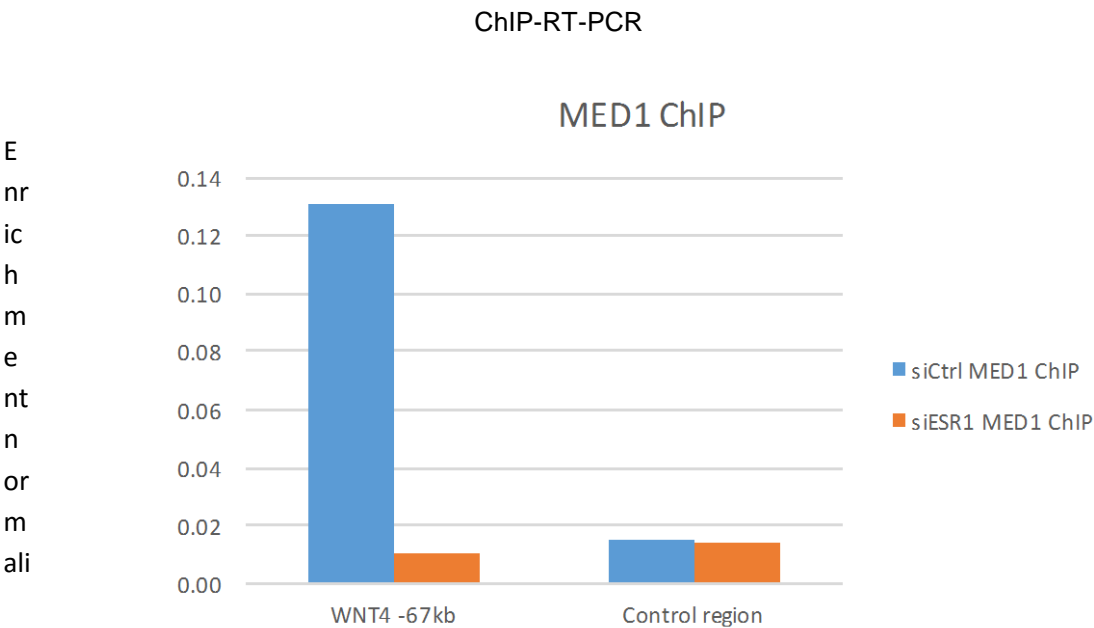

Supplemental Table 1

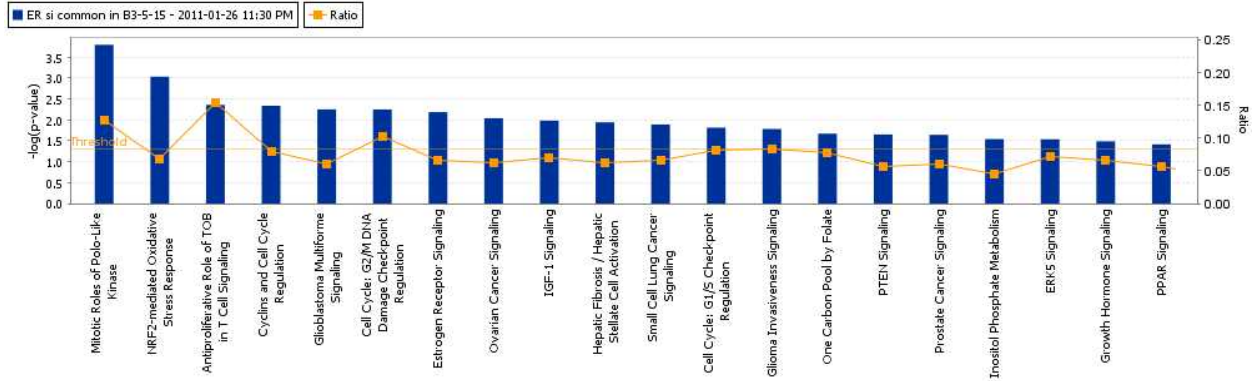

Supplemental Table 2

| <b>ID</b> | <b>Associated Network Functions</b>                                                        | <b>Score</b> |
|-----------|--------------------------------------------------------------------------------------------|--------------|
| 1         | Cell Cycle, DNA Replication, Recombination, and Repair, Cellular Assembly and Organization | 48           |
| 2         | Cell Morphology, Genetic Disorder, Lipid Metabolism                                        | 45           |
| 3         | DNA Replication, Recombination, and Repair, Cell-To-Cell Signaling and Interaction, Cancer | 39           |
| 4         | Organ Morphology, Tissue Morphology, Cell Signaling                                        | 38           |
| 5         | Carbohydrate Metabolism, Lipid Metabolism, Molecular Transport                             | 34           |

Supplemental Table 3

| <b>Molecular and Cellular Functions</b>    | <b>p-value</b>      | <b># Molecules</b> |
|--------------------------------------------|---------------------|--------------------|
| Cell Cycle                                 | 2.89E-19 - 6.49E-03 | 94                 |
| Cellular Assembly and Organization         | 1.27E-09 - 6.49E-03 | 46                 |
| DNA Replication, Recombination, and Repair | 1.27E-09 - 7.40E-03 | 71                 |
| Cellular Growth and Proliferation          | 1.72E-08 - 7.40E-03 | 139                |
| Cellular Development                       | 3.23E-08 - 7.28E-03 | 98                 |

Supplemental Table 4

| Symbol   | Entrez Gene Name                                             | fold change (mean) |
|----------|--------------------------------------------------------------|--------------------|
| AURKA    | Aurora kinase A                                              | 1.6                |
| AURKB    | Aurora kinase B                                              | 1.8                |
| BUB1     | Budding Uninhibited By Benzimidazoles 1                      | 1.8                |
| BUB1B    | budding uninhibited by benzimidazoles 1 homolog beta (yeast) | 2.0                |
| CCNA2    | cyclin A2                                                    | 1.8                |
| CCND3    | cyclin D3                                                    | 1.3                |
| CCNE2    | cyclin E2                                                    | 1.7                |
| CDC20    | cell division cycle 20 homolog ( <i>S. cerevisiae</i> )      | 1.8                |
| CDK1     | cyclin-dependent kinase 1                                    | 1.9                |
| CDK2     | cyclin-dependent kinase 2                                    | 1.3                |
| CKS2     | CDC28 protein kinase regulatory subunit 2                    | 1.5                |
| E2F8     | E2F transcription factor 8                                   | 1.3                |
| ESPL1    | extra spindle pole bodies homolog 1 ( <i>S. cerevisiae</i> ) | 1.4                |
| HSP90AA1 | heat shock protein 90kDa alpha (cytosolic), class A member 1 | 1.3                |
| KIF23    | kinesin family member 23                                     | 1.5                |
| NEK2     | NIMA (never in mitosis gene a)-related kinase 2              | 1.8                |
| NUSAP1   | nucleolar and spindle associated protein 1                   | 1.8                |
| PLK4     | polo-like kinase 4                                           | 1.9                |
| SKP2     | S-phase kinase-associated protein 2 (p45)                    | 1.4                |
| SLK      | STE20-like kinase                                            | 1.5                |
| TFDP1    | transcription factor Dp-1                                    | 1.2                |
| CDKN1C   | Cyclin dependent kinase inhibitor 1C                         | -                  |
| GAS1     | Growth arrest specific 1                                     | -                  |

Supplemental Table 5

| Protein Identification             | Peptide Sequence                                                                      |
|------------------------------------|---------------------------------------------------------------------------------------|
| Coil-coil domain protein           | <b>R.DEQDFR.N</b>                                                                     |
| Non-muscle myosin 9                | <b>K.ALSLAR.A,<br/>R.VVFQEFR.Q,<br/>R.VEEEEERCQHLQAEK.K,<br/>K.ANLQIDQINTDLNLER.S</b> |
| Brain 4 Transcription factor/ MED1 | <b>K.TDTSCHDL.-/<br/>K.DNPAQDFSTLYGSSPLER.Q</b>                                       |
| MED1                               | K.AQGETEESEK.L                                                                        |
| Phospholipase C                    | <b>K.EAAEPR.T</b>                                                                     |
| Vimentin                           | <b>R.SSVPGVR.L,<br/>R.SYVTTSTR.T,<br/>R.QQYESVAAK.N,<br/>R.ISLPLPNFSSLNLR.E</b>       |
| Peroxisome biogenesis factor       | K.GMMKELQTK.Q                                                                         |
| MED1                               | K.VTSLPAMTDR.L,<br>K.AQGETEESEK.L                                                     |
| Skeletal tropomyosin               | <b>R.AELSEGQVR.Q,<br/>R.IQLVEEELDR.A</b>                                              |
